# Supplementary material for: Expansion of different subpopulations of CD26−/low T cells in allergic and non-allergic asthmatics
Source: PubMed Central journal article supplement (PMC6525268; doi:10.1038/s41598-019-43622-8), 2019-05-17
Supplement: 41598_2019_43622_MOESM1_ESM.pdf [file 41598_2019_43622_MOESM1_ESM.pdf]

1 **Expansion of different subpopulations of CD26<sup>-low</sup> T cells in allergic**  
2 **and non-allergic asthmatics.**

3 **Authors**

4 Juan José Nieto-Fontarigo<sup>1</sup>, Francisco Javier Salgado\*<sup>1</sup>, María Esther San-José<sup>2</sup>, María Jesús  
5 Cruz<sup>3</sup>, Luis Valdés<sup>4</sup>, Amparo Pérez-Díaz<sup>5</sup>, Pilar Arias<sup>1</sup>, Montserrat Nogueira<sup>1</sup>, Francisco Javier  
6 González-Barcala<sup>6</sup>.

7 **Affiliations:**

8 <sup>1</sup>Department of Biochemistry and Molecular Biology, Faculty of Biology-Biological Research  
9 Centre (CIBUS), Universidade de Santiago de Compostela, Santiago de Compostela, Spain.

10 <sup>2</sup>Clinical Analysis Service, USC University Hospital Complex (CHUS), Santiago de  
11 Compostela, Spain.

12 <sup>3</sup>Department of Respiratory Medicine-Hospital Vall d'Hebron, Universitat Autònoma de  
13 Barcelona, Barcelona, Spain. Spanish Biomedical Research Networking Centre-CIBERES.

14 <sup>4</sup>Department of Medicine-University of Santiago de Compostela; Department of Respiratory  
15 Medicine-University Hospital of Santiago de Compostela; Health Research Institute of Santiago  
16 de Compostela (IDIS).

17 <sup>5</sup>Drug Screening Platform/Biofarma Research Group, Molecular Medicine and Chronic  
18 Diseases Research Center, University of Santiago de Compostela, Santiago de Compostela,  
19 Spain.

20 <sup>6</sup>Department of Medicine-University of Santiago de Compostela, Department of Respiratory  
21 Medicine-University Hospital of Santiago de Compostela, Spanish Biomedical Research  
22 Networking Centre-CIBERES; Health Research Institute of Santiago de Compostela (IDIS).

23 **Corresponding author:**

24 Francisco Javier Salgado Castro. Biology of Lymphocyte Group (BioLympho). Department of  
25 Biochemistry and Molecular Biology, Faculty of Biology-Biological Research Centre (CIBUS),

- 26 Universidade de Santiago de Compostela, Campus Vida, C/ Lope Gómez de marzoa s/n,  
27 Santiago de Compostela, Spain. E-mail: Phone: +34 881816941.
- 28 **Supplementary Tables: 4**
- 29 **Supplementary Figures: 6**

**Supplementary Table S1. Correlation of CD26 and CD126 expression with the % of different leukocyte subsets.**

|                              | Correlation between the % of cells and the % of CD26+ cells in each subpopulation |                  | Correlation between the % of cells and the % of CD126+ cells in each subpopulation |                  |
|------------------------------|-----------------------------------------------------------------------------------|------------------|------------------------------------------------------------------------------------|------------------|
|                              | $r_s$                                                                             | $P$              | $r_s$                                                                              | $P$              |
| <b>Eosinophils</b>           | <b>-.181</b>                                                                      | <b>.003</b>      | <b>.205</b>                                                                        | <b>&lt; .001</b> |
| <b>Monocytes</b>             | <b>-.206</b>                                                                      | <b>&lt; .001</b> | -.085                                                                              | .168             |
| <b>Neutrophils</b>           | .041                                                                              | .500             | .035                                                                               | .564             |
| <b>Lymphocytes</b>           | -.103                                                                             | .094             | -.057                                                                              | .354             |
| <b>CD4<sup>-</sup> cells</b> | <b>-.312</b>                                                                      | <b>&lt; .001</b> | <b>-.353</b>                                                                       | <b>&lt; .001</b> |
| <b>CD4<sup>+</sup> cells</b> | <b>.367</b>                                                                       | <b>&lt; .001</b> | <b>.211</b>                                                                        | <b>&lt; .001</b> |
| <b>Teff cells</b>            | <b>.469</b>                                                                       | <b>&lt; .001</b> | <b>.247</b>                                                                        | <b>&lt; .001</b> |
| <b>Treg cells</b>            | .023                                                                              | .702             | -.070                                                                              | .254             |
| <b>Tlow cells</b>            | <b>-.342</b>                                                                      | <b>&lt; .001</b> | <b>-.360</b>                                                                       | <b>&lt; .001</b> |

30

**Supplementary Table S2. Severity and control degree of the study patients.**

|                                                                                                                                                                                                                                                                                                                                                                         | <b>IMA</b>            | <b>MSA</b>        |  | <b>CA</b>          | <b>UA</b>         |
|-------------------------------------------------------------------------------------------------------------------------------------------------------------------------------------------------------------------------------------------------------------------------------------------------------------------------------------------------------------------------|-----------------------|-------------------|--|--------------------|-------------------|
| <b>N</b>                                                                                                                                                                                                                                                                                                                                                                | 102                   | 90                |  | 158                | 34                |
| <b>Age (mean (range))</b>                                                                                                                                                                                                                                                                                                                                               | 44 (20-72)            | 41 (18-68)        |  | 45 (18-72)         | 45 (20-68)        |
| <b>Sex (M/F)</b>                                                                                                                                                                                                                                                                                                                                                        | 33/69                 | 35/55             |  | 59/99              | 9/25              |
| <b>FEV1 (%)</b>                                                                                                                                                                                                                                                                                                                                                         | 105.0 (95.0-113.3)*** | 86.5 (67.0-100.0) |  | 99.0 (87.0-111.0)* | 82.0 (60.7-100.0) |
| <b>FEV1/FVC (%)</b>                                                                                                                                                                                                                                                                                                                                                     | 77.5 (72.5-81.2)***   | 70.3 (59.5-78.5)  |  | 76.4 (69.0-80.5)*  | 70.0 (56.4-76.8)  |
| <b>Neutrophils (10<sup>3</sup> cells/<math>\mu</math>L)</b>                                                                                                                                                                                                                                                                                                             | 3.60 (3.09-4.23)      | 3.62 (2.88-4.40)  |  | 3.58 (3.07-4.23)   | 4.17 (2.78-5.00)  |
| <b>Lymphocytes (10<sup>3</sup> cells/<math>\mu</math>L)</b>                                                                                                                                                                                                                                                                                                             | 1.97 (1.65-2.25)      | 1.97 (1.64-2.54)  |  | 1.95 (1.60-2.26)   | 2.02 (1.86-2.74)  |
| <b>Monocytes (10<sup>3</sup> cells/<math>\mu</math>L)</b>                                                                                                                                                                                                                                                                                                               | 0.39 (0.30-0.48)      | 0.39 (0.32-0.49)  |  | 0.38 (0.30-0.49)   | 0.41 (0.32-0.48)  |
| <b>Eosinophils (10<sup>3</sup> cells/<math>\mu</math>L)</b>                                                                                                                                                                                                                                                                                                             | 0.26 (0.17-0.39)*     | 0.33 (0.21-0.48)  |  | 0.27 (0.18-0.40)*  | 0.38 (0.21-0.63)  |
| <b>Basophils (10<sup>3</sup> cells/<math>\mu</math>L)</b>                                                                                                                                                                                                                                                                                                               | 0.04 (0.02-0.05)      | 0.04 (0.03-0.05)  |  | 0.04 (0.02-0.05)   | 0.04 (0.03-0.06)  |
| <b>IgE (IU/mL)</b>                                                                                                                                                                                                                                                                                                                                                      | 45.5 (15.5-205.0)     | 84.0 (28.2-209.5) |  | 79.0 (20.5-200.0)  | 62.0 (24.7-274.0) |
| <p><b>CA, controlled asthmatics; IMA, intermittent-mild asthmatics; MSA, moderate-severe asthmatics; UA, uncontrolled asthmatics.</b><br/> <b>Data are presented as median value (IQR1-3), unless otherwise expressed.</b><br/> <b>Mann-Whitney U test was used to compare IMA vs. MSA and CA vs. UA. * <math>P &lt; 0.05</math>; *** <math>P &lt; 0.001</math></b></p> |                       |                   |  |                    |                   |

**Supplementary Table S3. Average expression of CD26 and CD126 molecules in different leukocyte subsets and the half-life of these cells in peripheral circulation.**

|                                                  | <b>Eosinophils</b> | <b>Monocytes</b> | <b>Neutrophils</b> | <b>Lymphocytes</b> |
|--------------------------------------------------|--------------------|------------------|--------------------|--------------------|
| <b>Absolute count (x10<sup>3</sup> cells/mL)</b> | 0.04-0.4           | 0.2-0.8          | 2.5-7.5            | 1.5-3.5            |
| <b>% of CD126<sup>+</sup> cells*</b>             | 63.4 (44.5-77.5)   | 78.5 (52.2-91.0) | 99.5 (98.8-99.8)   | 55.3 (48.6-61.3)   |
| <b>% of CD26<sup>+</sup> cells*</b>              | 2.1 (1.4-3.2)      | 7.4 (3.5-17.6)   | 11.9 (5.0-27.7)    | 59.2 (54.4-66.4)   |
| <b>Half-life in peripheral blood<sup>#</sup></b> | 8-18 h             | 22-24 h          | 6 h - 5 days       | days-years         |

\*Median value (IQR1-3).

<sup>#</sup>Data come from Pillay J, et al. Blood. 2010;116:625-7; Park YM, et al. Allergy Asthma Immunol Res. 2010;2:87-101; Patel AA, et al. J Exp Med. 2017;214:1913-1923; Robertson JM, et al. Immunol Rev. 2006;211:49-57.

**Supplementary Table S4. List of monoclonal antibodies used in flow cytometry assays.**

| Target                                  | Clone      | Fluorophore    | Provider             | Cat. no     |
|-----------------------------------------|------------|----------------|----------------------|-------------|
| <b>CD3</b>                              | UCHT1      | FITC           | BD Pharmigen™        | 555332      |
| <b>CD4</b>                              | RPA-T4     | FITC           | BD Pharmigen™        | 555346      |
| <b>CD25</b>                             | M-A251     | PE-Cy7         | BD Pharmigen™        | 5135905     |
| <b>CD127</b>                            | HIL-7R-M21 | AlexaFluor-647 | BD Pharmigen™        | 558598      |
| <b>CD3</b>                              | UCHT1      | PerCP-Cy5.5    | BD Pharmigen™        | 560835      |
| <b>CD8</b>                              | RPA-T8     | PerCP-Cy5.5    | BD Pharmigen™        | 560662      |
| <b>CD19</b>                             | HIB19      | PerCP-Cy5.5    | BD Pharmigen™        | 561295      |
| <b>CD27</b>                             | M-T271     | PerCP-Cy5.5    | BD Pharmigen™        | 560612      |
| <b>CD28</b>                             | CD28.2     | PerCP-Cy5.5    | BD Pharmigen™        | 560685      |
| <b>CD45RA</b>                           | HI100      | PerCP-Cy5.5    | BD Pharmigen™        | 563429      |
| <b>CD56</b>                             | B159       | PerCP-Cy5.5    | BD Pharmigen™        | 560842      |
| <b>CD197 (CCR7)</b>                     | 150503     | PerCP-Cy5.5    | BD Pharmigen™        | 561144      |
| <b>TCR-<math>\gamma/\delta</math></b>   | B1         | FITC           | Biolegend            | 331207      |
| <b>CD26</b>                             | TP1/19     | PE             | Immunostep           | PE26 100T   |
| <b>CD126 (IL-6R<math>\alpha</math>)</b> | REA291     | PE             | MACS Miltenyi Biotec | 130-104-101 |

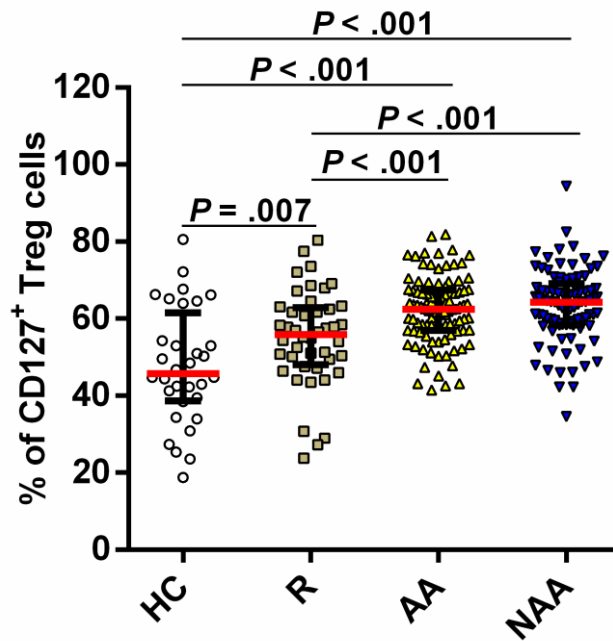

35

36 **Supplementary Figure S1. Rhinitic and asthmatic patients show augmented levels of**  
 37 **CD127<sup>+</sup> regulatory T cells.** Lymphocytes from healthy controls (HC; N = 32) and patients with  
 38 rhinitis (R; N = 44), allergic asthma (AA; N = 100), and non-allergic asthma (NAA; N = 92)  
 39 were gated on FSC/SSC plots and further subdivided into CD4<sup>-</sup> and CD4<sup>+</sup> cells. Then,  
 40 regulatory T cells (Treg) were identified amongst CD4<sup>+</sup> T lymphocytes according to CD25 and  
 41 CD127 markers. Afterwards, the percentage of CD127<sup>+</sup> cells within the Treg compartment was  
 42 measured. Statistically significant difference between the different groups of donors is indicated  
 43 ( $P < .05$ ).

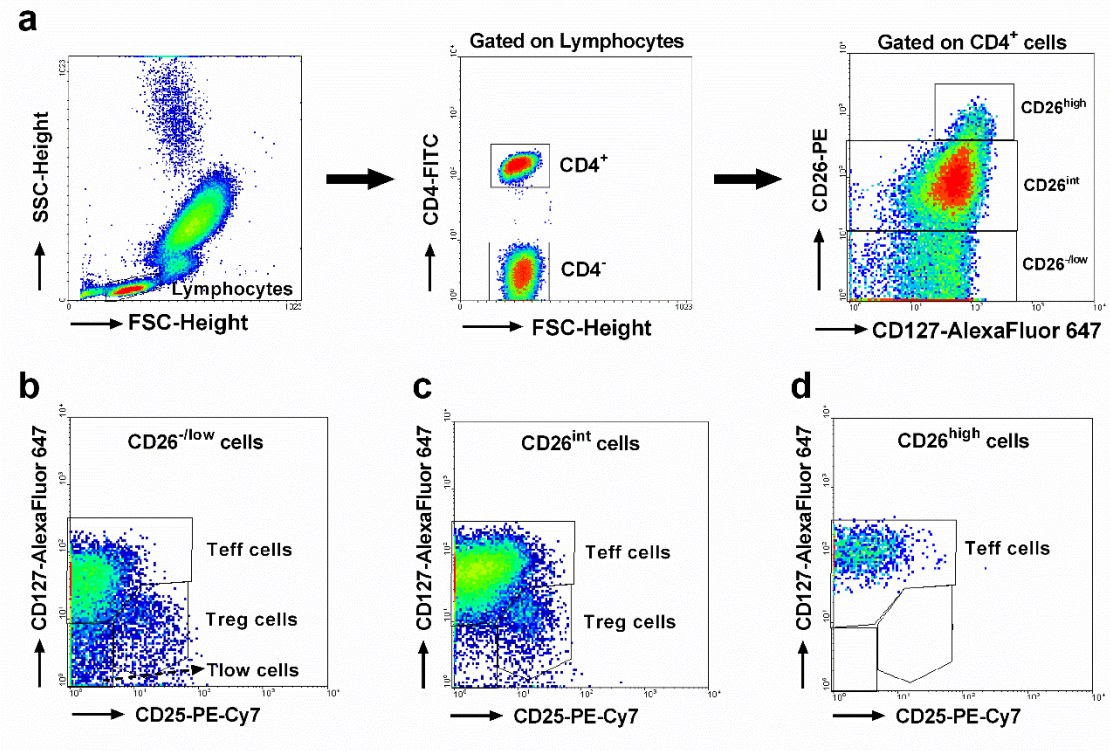

44

45 **Supplementary Figure S2. Treg cells are distributed within CD26<sup>low</sup> and CD26<sup>int</sup> subsets**  
 46 **of CD4<sup>+</sup> T cells.** a) Lymphocytes from healthy controls (HC) and patients with rhinitis (R),  
 47 allergic asthma (AA), and non-allergic asthma (NAA) were gated on FSC/SSC plots and further  
 48 subdivided into CD4<sup>-</sup> and CD4<sup>+</sup> cells. Then, 3 subsets of CD4<sup>+</sup> lymphocytes were identified  
 49 based on CD26 and CD127 markers: CD26<sup>low</sup>, CD26<sup>int</sup> and CD26<sup>high</sup>. As figures **b-d** point out,  
 50 Treg cells (CD25<sup>high</sup>CD127<sup>low</sup>) are present in CD26<sup>low</sup> (**b**) and CD26<sup>int</sup> (**c**) subsets of CD4<sup>+</sup> T  
 51 lymphocytes, but not amongst the CD26<sup>high</sup> compartment of T helper cells (**d**).



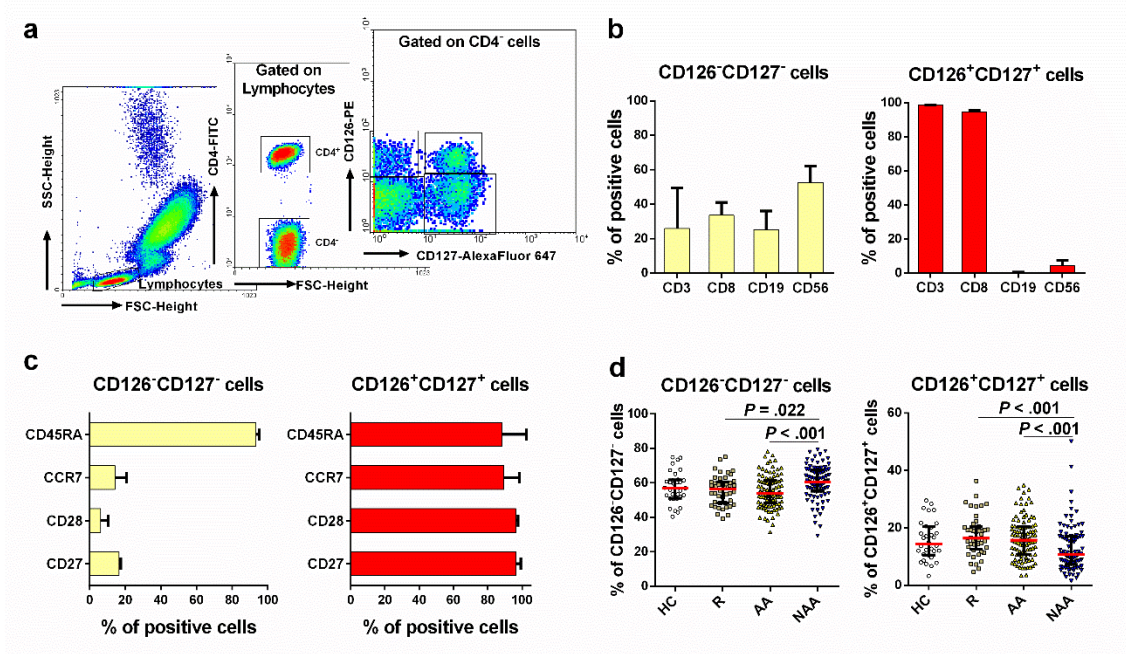

52

53 **Supplementary Figure S3. CD4<sup>+</sup> lymphocytes with a CD126<sup>-</sup>CD127<sup>-</sup> phenotype are**  
 54 **increased in non-allergic asthmatics (NAA) compared to allergic asthmatics (AA).** a) CD4<sup>+</sup>  
 55 lymphocytes were identified through the gating strategy depicted (left and middle dot-plots),  
 56 and expression of CD127 and CD126 was used to identify four subsets (right dot plot). b)  
 57 Lymphocyte subset composition of CD4<sup>+</sup>CD126<sup>-</sup>CD127<sup>-</sup> and CD4<sup>+</sup>CD126<sup>+</sup>CD127<sup>+</sup> cells based  
 58 on CD3 (T), CD8 (Tc), CD19 (B), and CD56 (NK, NKT) antigens. c) Phenotype of CD4<sup>+</sup>  
 59 CD126<sup>-</sup>CD127<sup>-</sup> and CD4<sup>+</sup>CD126<sup>+</sup>CD127<sup>+</sup> cells based on CD45RA, CCR7, CD127, CD28, and  
 60 CD27 markers. We evidenced that the former CD26<sup>int</sup>CD127<sup>+</sup> and CD26<sup>high</sup>CD127<sup>+</sup> subsets  
 61 were combined in one single CD4<sup>+</sup> population (CD126<sup>+</sup>CD127<sup>+</sup> cells), with a homogeneous  
 62 naïve-memory CD3<sup>+</sup> and CD8<sup>+</sup> phenotype. In contrast, the CD126<sup>-</sup>CD127<sup>-</sup> subset comprised  
 63 T<sub>EMRA</sub>-like cells (CD45RA<sup>high</sup>CCR7<sup>low</sup>CD27<sup>low</sup>CD28<sup>low</sup>), but a less-defined CD4<sup>+</sup> lymphoid  
 64 origin (B, NK, NKT, or  $\gamma\delta$ -T cells). In b) and c), data were obtained from 3 representative  
 65 donors. d) Percentage (median  $\pm$  IQR) of CD126<sup>-</sup>CD127<sup>-</sup> and CD126<sup>+</sup>CD127<sup>+</sup> cells in CD4<sup>+</sup>  
 66 lymphocytes from healthy controls (HC; N = 32) and patients with rhinitis (R; N = 44), allergic  
 67 asthma (AA; N = 100), and non-allergic asthma (NAA; N = 92). Like CD4<sup>+</sup>CD26<sup>+</sup>CD127<sup>+</sup>  
 68 lymphocytes, CD4<sup>+</sup>CD126<sup>+</sup>CD127<sup>+</sup> cells were reduced in NAA compared to AA, which was  
 69 associated to the expansion of the double negative (CD126<sup>-</sup>CD127<sup>-</sup>) compartment in NAA.  
 70 Only results from those subpopulations with significant differences between donor groups were  
 71 shown. Statistically significant differences between groups of donors were indicated (Kruskal-  
 72 Wallis test:  $P < .05$ ).

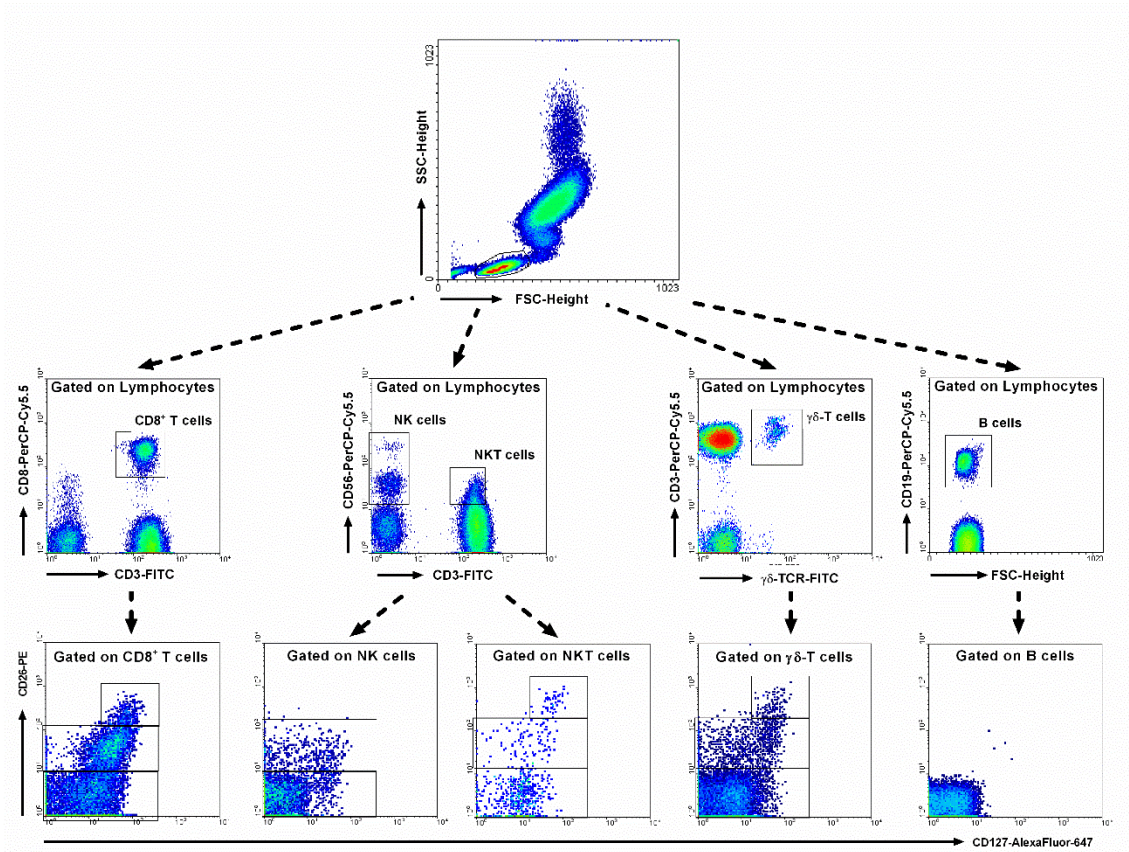

73

74 **Supplementary Figure S4. Gating strategy for CD8<sup>+</sup> Tc, NK, NKT,  $\gamma\delta$ -T, and B**  
 75 **lymphocytes.** After gating, expression of CD127 and CD26 was used to identify different  
 76 subsets (lower row of dot-plots). CD3<sup>+</sup> lymphocytes (Tc, NKT,  $\gamma\delta$ -T) were characterized by the  
 77 presence of three subsets (CD26<sup>-/low</sup>, CD26<sup>int</sup>, and CD26<sup>high</sup>), while CD3<sup>-</sup> lymphocytes displayed  
 78 a double (CD26<sup>-/low</sup>, CD26<sup>int</sup>; NK cells) or a single (CD26<sup>-</sup>; B cells) phenotype.

79

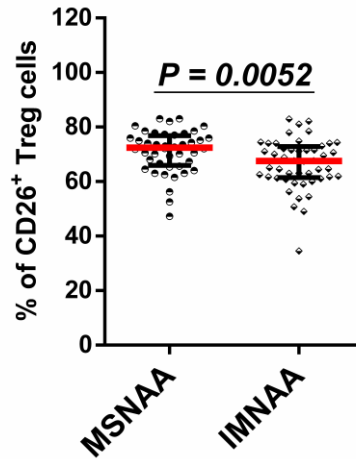

80

81 **Supplementary Figure S5. Moderate-severe non-allergic asthmatics display higher**  
82 **percentage of CD26<sup>+</sup> regulatory T cells than intermittent-mild non-allergic asthmatics.**

83 Lymphocytes from either moderate-severe non-allergic (MSNAA; N = 90) or intermittent-mild  
84 non-allergic (IMNAA; N = 102) asthmatics were gated on FSC/SSC plots and further  
85 subdivided into CD4<sup>-</sup> and CD4<sup>+</sup> cells. Then, regulatory T cells (Treg) were identified amongst  
86 CD4<sup>+</sup> T lymphocytes according to CD25 and CD127 markers. Afterwards, the percentage of  
87 CD26<sup>+</sup> cells within the Treg compartment was measured. Statistically significant difference  
88 between the different groups of donors is indicated (*P*-value).

89

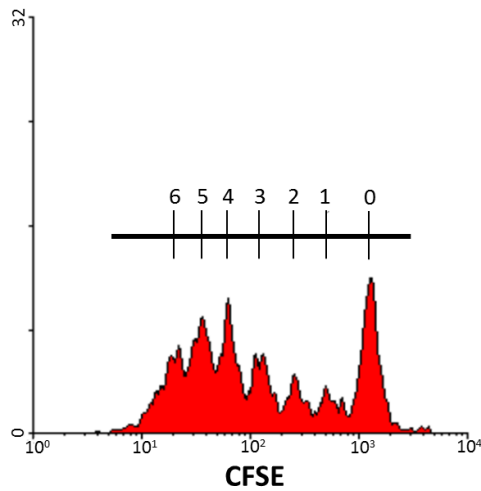

90

91 **Supplementary Figure S6. Analysis of the number of cell divisions by flow cytometry.**  
 92 PBMCs were stained with 5  $\mu$ M CFSE and cultured at  $0.25 \times 10^6$  cells/mL in complete medium  
 93 (RPMI 1640, 10% FBS, 100  $\mu$ g/mL streptomycin, 100 U/mL penicillin) supplemented with 1  
 94  $\mu$ g/ml PHA as a T-cell specific polyclonal stimulus. Upon 6 days of *in vitro* culture, CFSE  
 95 fluorescence decay was measured by flow cytometry and allowed the calculation of the number  
 96 of cell divisions. A representative histogram plot is shown, where numbers 1-6 represent the  
 97 corresponding round of division, and 0 those lymphocytes that remained at a resting state.  
 98 Responder frequency (Rf) was calculated as the percentage of cells that divided at least once  
 99 (i.e., percentage of cells that divide from 1 to 6 times).

100
